# Supplementary material for: Interval analysis of interictal EEG: pathology of the alpha rhythm in focal epilepsy
Source: PubMed Central journal article supplement (PMC4639771; doi:10.1038/srep16230), 2015-11-10
Supplement: srep16230-s1.pdf [file srep16230-s1.pdf]

# Interval analysis of interictal EEG: pathology of the alpha rhythm in focal epilepsy.

Jan Pyrzowski, Mariusz Siemiński, Anna Sarnowska, Joanna Jedrzejczak, Walenty M. Nyka

## Supplementary Information

Supplementary Figure 1.

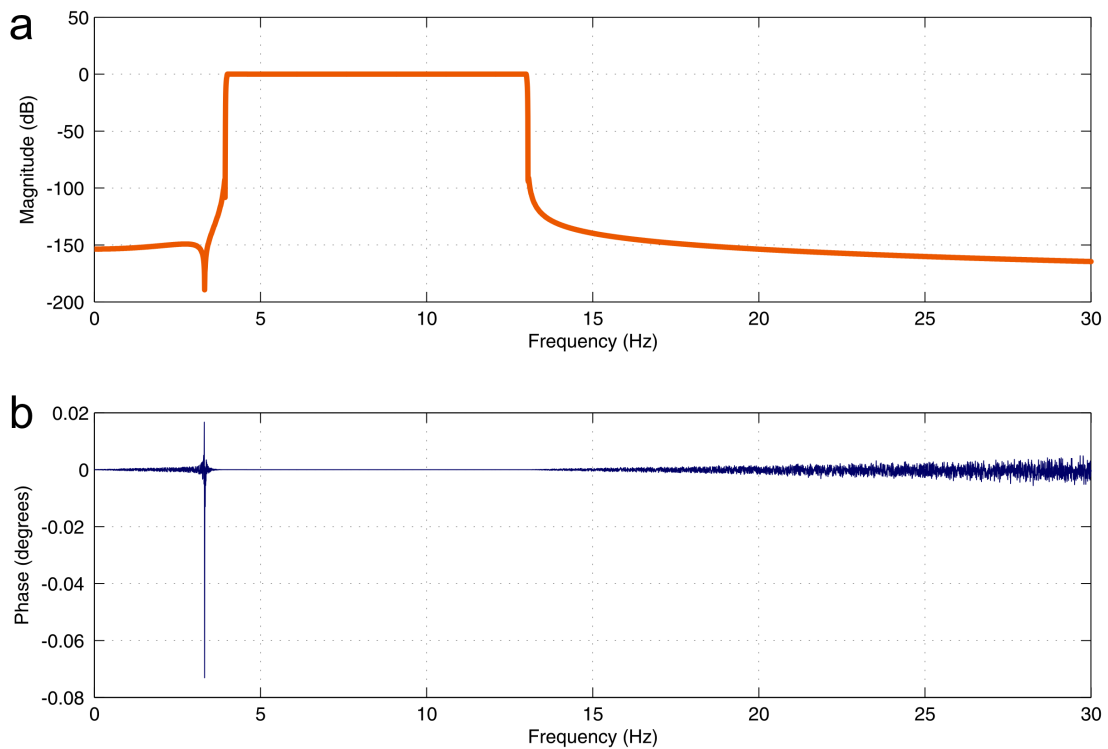

Frequency response of a representative filter ([4-13Hz] band-pass) used in signal preprocessing (see Methods). (a) Magnitude response. (b) Phase response.

Supplementary Figure 2.

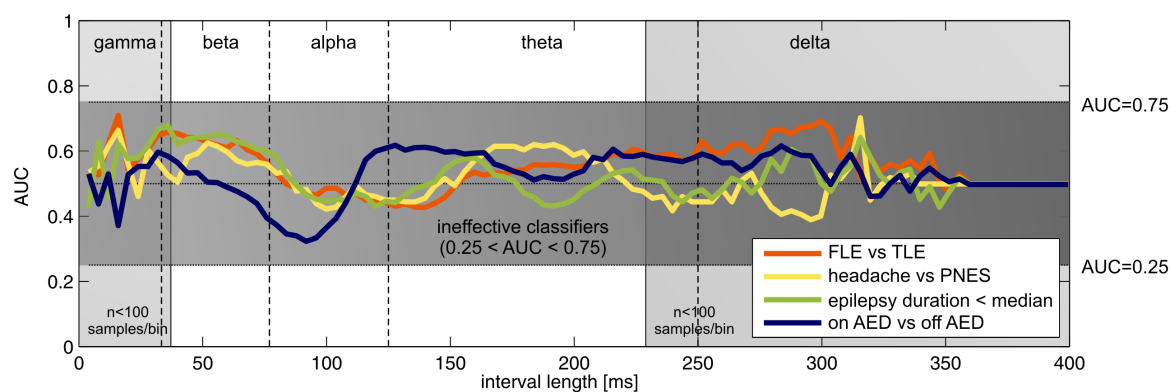

“Naive” AUC-interval length relationship curves for additional classification problems (supplement to Fig. 1d): discrimination between diagnosis subgroups (FLE vs TLE, headache vs PNES), discrimination of patients with epilepsy basing on the duration of disease ( $>$ median duration vs  $<$  median duration) and discrimination of patients on AED from those not taking medication. For all curves  $0.25 < \text{AUC} < 0.75$  which points to no potentially effective interval spectrum magnitude based classification.

### Supplementary Figure 3.

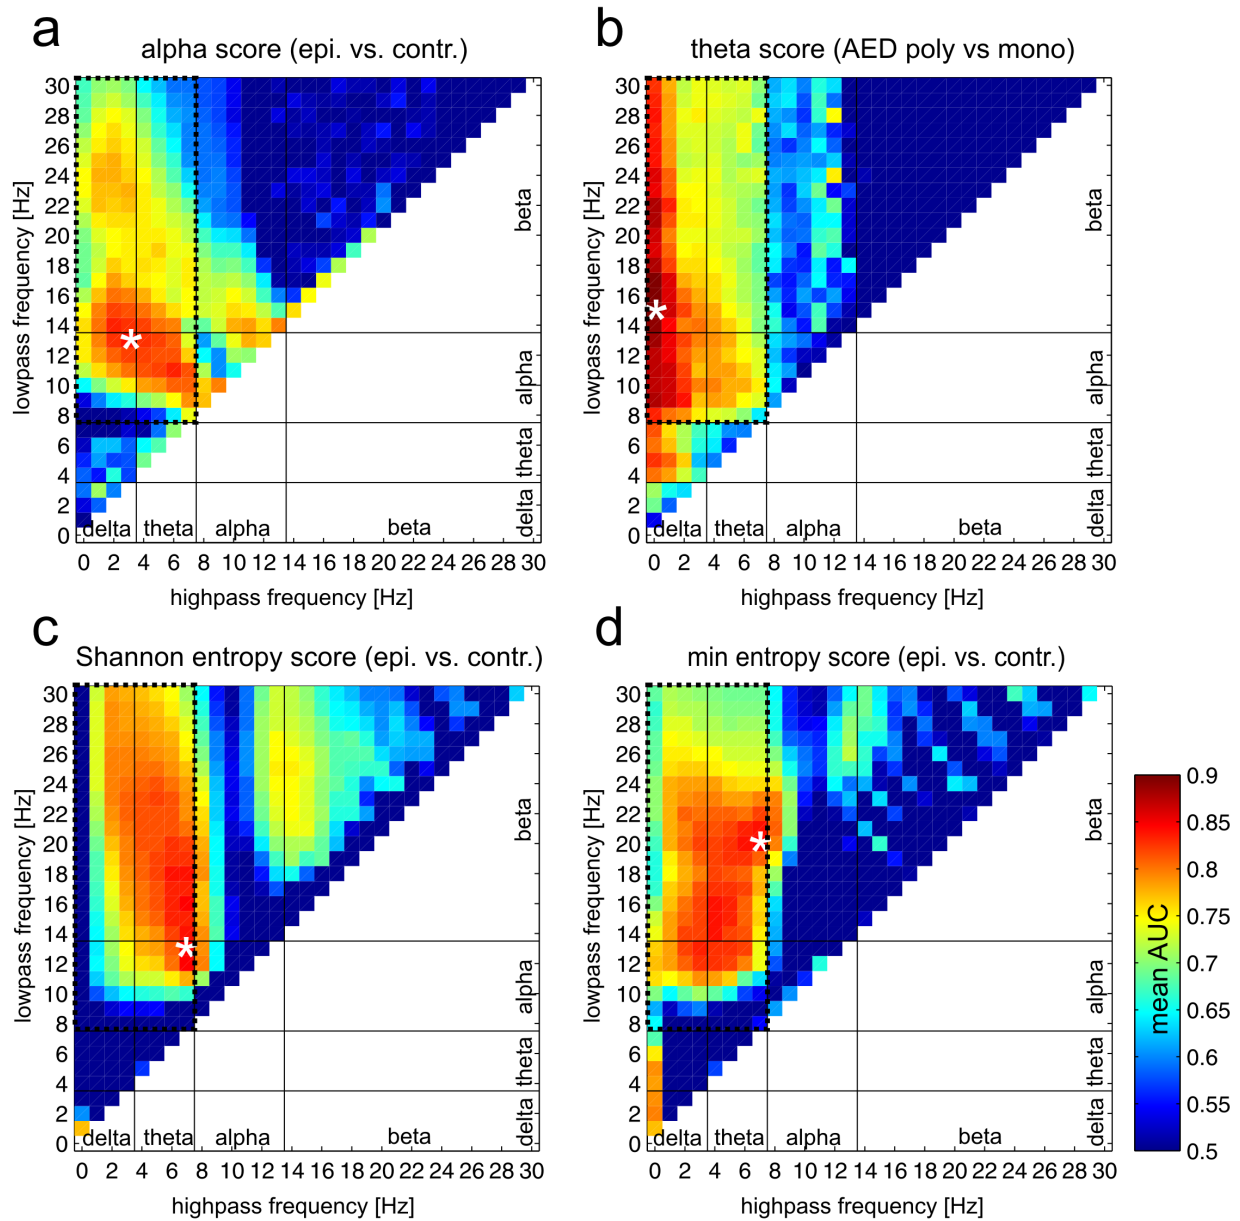

Trends in the optimization of alpha-, entropy- and theta-score based classifiers with respect to prefiltering passbands (one-step fitting - see Results). The colour scale is common for all 4 panels and represents AUC values obtained during classifier fitting and averaged over all cross-validation folds (for the results of cross-validation - see Table 2). As can be seen AUC varies smoothly across wide regions of passband values. AUC > 0.75 occurred almost exclusively when the passband included the alpha band (regions demarked by dashed lines). Asterisks represent most common passband combinations that maximized classifier performance (see also Table 2).

Supplementary Figure 4.

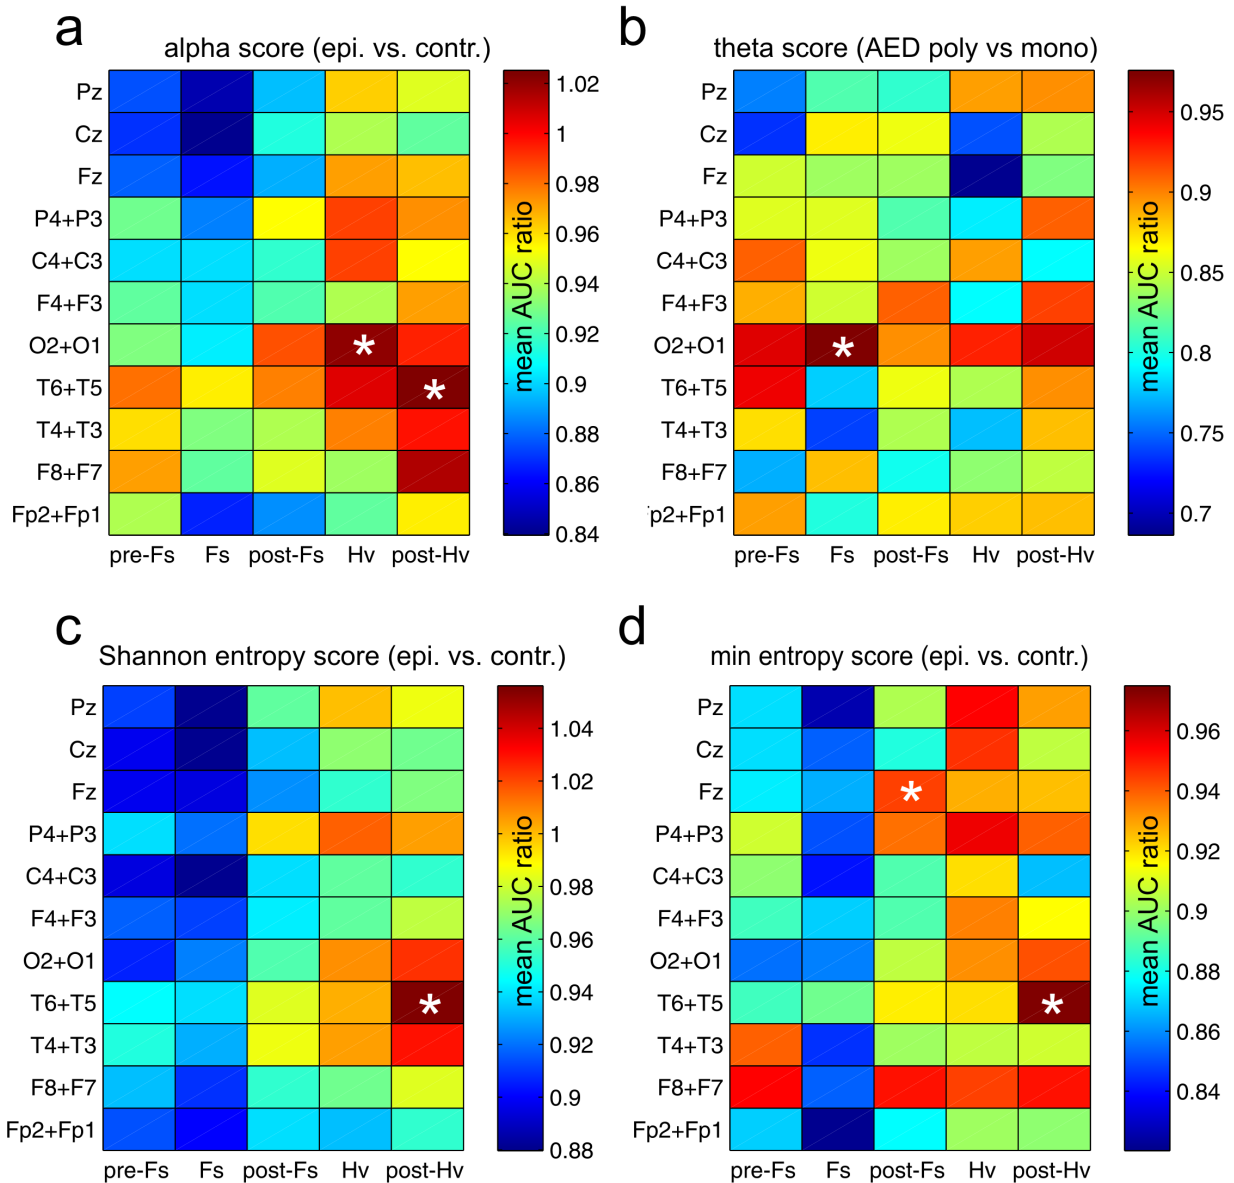

Trends in the optimization of alpha-, entropy- and theta-score based classifiers with respect to individual channel/segment combinations (second step of two-step fitting - see Results). The results are displayed as mean AUC ratios (see Results) and are directly related to Fig. 2a and b. Asterisks represent most common channel/segment combinations that maximized classifier performance (see also Table 2).

Supplementary Table 1

| Subject no. | Sex | Age | Age (first seizure) | Diagnosis | Secondary generalization of seizures | AEDs taken by subject                               | EEG visual review  | Comorbidities (ICD-10)                            |
|-------------|-----|-----|---------------------|-----------|--------------------------------------|-----------------------------------------------------|--------------------|---------------------------------------------------|
| 1           | M   | 34  | 30                  | TLE       | yes                                  | LTG 200mg/d                                         | normal             | n/a                                               |
| 2           | M   | 34  | 17                  | TLE       | yes                                  | CBZ 200mg/d                                         | normal variant     | n/a                                               |
| 3           | M   | 56  | 14                  | TLE       | yes                                  | VPA 1300mg/d                                        | normal             | n/a                                               |
| 4           | F   | 20  | 10                  | TLE       | yes                                  | VPA 600mg/d,<br>TPM 400mg/d,<br>LTG 300mg/d         | non-specific path. | F39                                               |
| 5           | F   | 50  | n/a                 | TLE       | yes                                  | VPA 1500mg/d,<br>CBZ 800mg/d,<br>Clonazepam 3mg/d   | normal             | n/a                                               |
| 6           | F   | 68  | 29                  | TLE       | yes                                  | clonazepam 1,5mg/d                                  | IEDs               | n/a                                               |
| 7           | F   | 19  | 17                  | TLE       | no                                   | LEV 2000mg/d,<br>LTG 300mg/d                        | normal variant     | n/a                                               |
| 8           | M   | 32  | 21                  | TLE       | n/a                                  | VPA 1800mg/d,<br>LEV 1500mg/d                       | normal             | n/a                                               |
| 9           | F   | 37  | 1                   | TLE       | yes                                  | OXC 1200mg/d,<br>TPM 400mg/d                        | IEDs               | F48.9                                             |
| 10          | F   | 39  | 34                  | TLE       | yes                                  | VPA 1600mg/d                                        | normal variant     | n/a                                               |
| 11          | M   | 48  | 17                  | TLE       | no                                   | LEV 3000mg/d,<br>VPA 2000mg/d,<br>Clonazepam 6mg/d  | normal variant     | E78                                               |
| 12          | F   | 46  | 17                  | TLE       | yes                                  | CBZ 1200mg/d,<br>GBP 1800mg/d                       | non-specific path. | I83.9                                             |
| 13          | M   | 50  | 17                  | TLE       | yes                                  | LTG 400mg/d,<br>LEV 2250mg/d,<br>TGB 30mg/d         | IEDs               | F48.9                                             |
| 14          | F   | 53  | 22                  | TLE       | yes                                  | CBZ 1000mg/d,<br>LTG 200mg/d,<br>clonazepam 0.5mg/d | non-specific path. | F39, F06.7                                        |
| 15          | F   | 53  | 16                  | TLE       | yes                                  | LTG 400mg/d,<br>PHT 400mg/d,<br>LEV 3000mg/d        | IEDs               | F33                                               |
| 16          | F   | 39  | 6                   | TLE       | no                                   | CBZ 750mg/d                                         | normal variant     | I35, I33, st. post I63,<br>st. post temporal res. |
| 17          | F   | 37  | n/a                 | TLE       | yes                                  | LTG 400mg/d,<br>CBZ 1800mg/d                        | non-specific path. | E78                                               |
| 18          | F   | 52  | 1                   | TLE       | yes                                  | LEV 2000mg/d,<br>GBP 2400mg/d                       | IEDs               | I49.9                                             |
| 19          | F   | 28  | 8                   | TLE       | no                                   | GBP 1800mg/d,<br>TPM 300mg/d                        | IEDs               | E66                                               |
| 20          | F   | 27  | 22                  | FLE       | yes                                  | OXC 1200mg/d                                        | IEDs               | n/a                                               |
| 21          | M   | 60  | 50                  | FLE       | yes                                  | -                                                   | non-specific path. | I25(o)                                            |
| 22          | F   | 30  | 12                  | FLE       | no                                   | -                                                   | normal variant     | E80.2                                             |
| 23          | M   | 27  | 17                  | FLE       | no                                   | alprazolam 0,25mg/d                                 | normal             | n/a                                               |
| 24          | F   | 26  | 12                  | FLE       | yes                                  | LTG 200mg/d,<br>diazepam 5mg/d                      | normal             | n/a                                               |
| 25          | F   | 62  | 56                  | FLE       | yes                                  | CBZ 1000mg/d,<br>LTG 100mg/d                        | normal variant     | I10, E78, F41.2, M50,<br>D25(o), N60(o)           |
| 26          | F   | 50  | 48                  | FLE       | yes                                  | -                                                   | non-specific path. | E78                                               |

|    |   |    |     |          |     |                                               |                    |                                                                    |
|----|---|----|-----|----------|-----|-----------------------------------------------|--------------------|--------------------------------------------------------------------|
| 27 | M | 26 | n/a | FLE      | no  | LEV 3500mg/d,<br>CBZ 1000mg/d,<br>TPM 100mg/d | non-specific path. | F44.5, G80                                                         |
| 28 | M | 18 | 17  | FLE      | no  | -                                             | normal variant     | n/a                                                                |
| 29 | M | 24 | 7   | FLE      | no  | CBZ 900mg/d,<br>TPM 200mg/d                   | norma              | n/a                                                                |
| 30 | F | 57 | 12  | FLE      | no  | LEV 2500mg/d,<br>VPA 1600mg/d                 | normal             | n/a                                                                |
| 31 | F | 25 | 15  | FLE      | yes | OXC 1800mg/d                                  | IEDs               | n/a                                                                |
| 32 | F | 25 | 7   | FLE      | yes | LEV 2000mg/d,<br>TPM 200mg/d                  | normal             | F44.5                                                              |
| 33 | F | 54 | 11  | FLE      | yes | OXC 1500mg/d,<br>LEV 2000mg/d                 | normal             | I10, E78,<br>st. post partial parietal res.                        |
| 34 | F | 34 | 5   | FLE      | yes | LEV 2000mg/d,<br>VPA300mg/d                   | IEDs               | n/a                                                                |
| 35 | F | 34 | n/a | FLE      | yes | CBZ 1200mg/d,<br>LEV 2500mg/d,<br>TPM 250mg/d | IEDs               | n/a                                                                |
| 36 | F | 35 | 15  | FLE      | yes | VPA 1000mg/d,<br>CBZ 800mg/d                  | IEDs               | F61, J45                                                           |
| 37 | F | 23 | n/a | FLE      | yes | VPA 2000mg/d,<br>CBZ 1500mg/d                 | IEDs               | n/a                                                                |
| 38 | F | 20 | 7   | FLE      | yes | VPA 1250mg/d,<br>GBP 900mg/d,<br>OXC          | non-specific path. | F71, st po I63,<br>E03, I49.9                                      |
| 39 | F | 26 | 20  | FLE      | yes | VPA 1800mg/d                                  | normal             | n/a                                                                |
| 40 | M | 40 | 2   | FLE      | yes | VPA 2000mg/d,<br>TPM 225mg/d                  | IEDs               | E78, F70                                                           |
| 41 | F | 37 | 33  | FLE      | yes | GBP 1200mg/d                                  | normal variant     | n/a                                                                |
| 42 | F | 31 | 27  | FLE      | yes | CBZ 1200mg/d,<br>TPM 100mg/d                  | non-specific path. | n/a                                                                |
| 43 | F | 23 | 0   | FLE      | no  | CBZ 600mg/d,<br>VGB 1000mg/d                  | non-specific path. | B18,<br>st. post C92.0                                             |
| 44 | F | 22 | 15  | FLE      | yes | TPM 50mg/d,<br>LEV 3000mg/d,<br>LTG 175mg/d   | IEDs               | st. post corpus callosotomy,<br>st. post partial frontal resection |
| 45 | M | 21 | 14  | FLE      | yes | LEV 4000mg/d,<br>VPA 1000mg/d,<br>TPM 200mg/d | normal variant     | n/a                                                                |
| 46 | M | 26 | n/a | FLE      | n/a | LTG 600mg/d,<br>LEV 3500mg/d                  | normal             | n/a                                                                |
| 47 | F | 35 | 10  | FLE      | yes | VPA 200mg/d,<br>LEV 2500mg/d,<br>GBP 2400mg/d | normal variant     | n/a                                                                |
| 48 | F | 31 | 14  | FLE      | no  | VPA 2000mg/d,<br>LTG 250mg/d,<br>LEV 2250mg/d | IEDs               | R55                                                                |
| 49 | M | 27 | 10  | FLE      | no  | LEV 2000mg/d                                  | normal             | I49.9                                                              |
| 50 | F | 20 | 0   | FLE      | no  | VPA 450mg/d,<br>STP 500mg/d,<br>CLB 20mg/d    | normal variant     | st. post VNS implantation                                          |
| 51 | F | 31 | n/a | FLE      | yes | TPM 250mg/d,<br>LTG 200mg/d,<br>VPA 600mg/d   | non-specific path. | st. post G03,<br>G91(o), C71(o)                                    |
| 52 | M | 35 | n/a | headache | n/a | LEV 1000mg/d                                  | IEDs               | H81, obs. quoad<br>G40 – negative                                  |
| 53 | F | 41 | n/a | headache | n/a | -                                             | non-specific path. | E34.9, F33                                                         |
| 54 | F | 38 | n/a | headache | n/a | VPA 1000mg/d                                  | non-specific path. | E03, F31                                                           |
| 55 | M | 47 | n/a | headache | n/a | -                                             | normal variant     | n/a                                                                |

|    |   |    |     |          |     |                             |                    |              |
|----|---|----|-----|----------|-----|-----------------------------|--------------------|--------------|
| 56 | F | 44 | n/a | headache | n/a | -                           | non-specific path. | I67.1, F43.2 |
| 57 | F | 43 | n/a | headache | n/a | -                           | non-specific path. | G43          |
| 58 | F | 21 | n/a | headache | n/a | -                           | normal             | n/a          |
| 59 | M | 48 | n/a | headache | n/a | -                           | non-specific path. | st. post G00 |
| 60 | F | 37 | n/a | headache | n/a | -                           | normal variant     | n/a          |
| 61 | F | 19 | n/a | headache | n/a | -                           | normal variant     | G44.2        |
| 62 | F | 39 | n/a | headache | n/a | -                           | non-specific path. | G43          |
| 63 | F | 25 | n/a | headache | n/a | -                           | normal             | G44.2        |
| 64 | F | 55 | n/a | headache | n/a | -                           | normal             | G44.2        |
| 65 | F | 44 | n/a | headache | n/a | -                           | normal             | n/a          |
| 66 | F | 36 | n/a | PNES     | n/a | LEV 2750mg/d                | IEDs               | n/a          |
| 67 | F | 20 | n/a | PNES     | n/a | VPA 3000mg/d                | IEDs               | E03          |
| 68 | F | 21 | n/a | PNES     | n/a | VPA 600mg/d                 | normal             | n/a          |
| 69 | F | 20 | n/a | PNES     | n/a | -                           | non-specific path. | n/a          |
| 70 | F | 45 | n/a | PNES     | n/a | OXC 1500mg/d                | normal variant     | n/a          |
| 71 | F | 24 | n/a | PNES     | n/a | CBZ 900mg/d                 | non-specific path. | F11          |
| 72 | M | 31 | n/a | PNES     | n/a | VPA 300mg/d                 | normal variant     | F61          |
| 73 | F | 19 | n/a | PNES     | n/a | LTG 100mg/d                 | normal             | n/a          |
| 74 | F | 26 | n/a | PNES     | n/a | LTG 200mg/d                 | normal             | n/a          |
| 75 | F | 57 | n/a | PNES     | n/a | LTG                         | n/a                | n/a          |
| 76 | M | 20 | n/a | PNES     | n/a | -                           | normal             | n/a          |
| 77 | F | 20 | n/a | PNES     | n/a | VPA 300mg/d,<br>CBZ 300mg/d | non-specific path. | n/a          |
| 78 | F | 36 | n/a | PNES     | n/a | OXC 300mg/d                 | non-specific path. | n/a          |

Detailed clinical data of the studied patient group. Abbreviations: FLE - frontal lobe pilepsy, TLE - temporal lobe epilepsy, PNES - psychogenic nonepileptic seizures, VNS - vagus nerve stimulation, IEDs - interictal discharges. Where clinical data were not available (or not applicable) respective fields are marked with n/a. Antiepileptic drugs are denoted by standard abbreviations (drug dosing is not specified if it was not available), comorbidities are represented by ICD-10 codes.
